# Supplementary material for: Performance and Metabolic, Inflammatory, and Oxidative Stress-Related Parameters in Early Lactating Dairy Cows with High and Low Hepatic FGF21 Expression
Source: MDPI journal article supplement (doi:10.3390/ani13010131), 2022-12-29
Supplement: s1 [file s1]

**Table S1. Validation of gene chip data for selected differentially expressed transcripts by qPCR.**

| Gene symbol    | mRNA description                                   | Mean fold change <sup>1</sup> |       | <i>P</i> -value |        |
|----------------|----------------------------------------------------|-------------------------------|-------|-----------------|--------|
|                |                                                    | Gene chip                     | qPCR  | Gene chip       | qPCR   |
| <i>FGF21</i>   | fibroblast growth factor 21                        | 4.23                          | 16.0  | 0.00001         | 0.0027 |
| <i>MT1E</i>    | metallothionein 1E                                 | 3.58                          | 2.44  | 0.02151         | 0.0347 |
| <i>GPX3</i>    | glutathione peroxidase 3 (plasma)                  | 2.90                          | 1.75  | 0.04557         | 0.2142 |
| <i>MT1A</i>    | metallothionein-1A                                 | 2.64                          | 2.84  | 0.01646         | 0.0447 |
| <i>STEAP4</i>  | STEAP family member 4                              | 1.94                          | 1.20  | 0.04495         | 0.3022 |
| <i>MT2A</i>    | metallothionein 2A                                 | 1.89                          | 1.44  | 0.04520         | 0.1343 |
| <i>STK39</i>   | serine threonine kinase 39                         | 1.81                          | 1.54  | 0.00307         | 0.0626 |
| <i>PPP1R3C</i> | protein phosphatase 1, regulatory subunit 3C       | 1.74                          | 1.98  | 0.00644         | 0.0195 |
| <i>INHBE</i>   | inhibin, beta E                                    | 1.72                          | 1.64  | 0.00014         | 0.0708 |
| <i>PKD1L3</i>  | polycystic kidney disease 1-like 3                 | 1.67                          | 1.32  | 0.01529         | 0.1226 |
| <i>BCL6</i>    | B-cell CLL/lymphoma 6                              | 1.67                          | 1.11  | 0.00271         | 0.3154 |
| <i>LBP</i>     | lipopolysaccharide binding protein                 | 1.67                          | 1.50  | 0.02337         | 0.2136 |
| <i>HAL</i>     | histidine ammonia-lyase                            | -1.91                         | -3.96 | 0.00167         | 0.0125 |
| <i>MFSD2A</i>  | major facilitator superfamily domain containing 2A | -1.89                         | -2.02 | 0.00185         | 0.0072 |

|               |                                                             |       |       |         |        |
|---------------|-------------------------------------------------------------|-------|-------|---------|--------|
| <i>LPIN1</i>  | lipin 1                                                     | -1.77 | -3.86 | 0.01014 | 0.0140 |
| <i>GSTM2</i>  | glutathione S-transferase M2                                | -1.75 | -2.63 | 0.00998 | 0.0031 |
| <i>GSTM1</i>  | glutathione S-transferase M1                                | -1.68 | -1.79 | 0.00878 | 0.0474 |
| <i>ASCL1</i>  | achaete-scute family bHLH transcription factor 1            | -1.64 | -2.58 | 0.02755 | 0.0199 |
| <i>ERRFI1</i> | ERBB receptor feedback inhibitor 1                          | -1.60 | -2.85 | 0.00724 | 0.0034 |
| <i>VWA3B</i>  | von Willebrand factor A domain containing 3B                | -1.59 | -2.50 | 0.01272 | 0.0221 |
| <i>ATP10B</i> | ATPase, class V, type 10B                                   | -1.57 | -4.72 | 0.00278 | 0.0050 |
| <i>LGR5</i>   | leucine-rich repeat containing G protein-coupled receptor 5 | -1.56 | -1.69 | 0.01635 | 0.0369 |
| <i>ZPR1</i>   | ZPR1 zinc finger                                            | -1.55 | -2.93 | 0.00124 | 0.0001 |
| <i>ZNF37A</i> | zinc finger protein 37A                                     | -1.54 | -1.64 | 0.00651 | 0.0737 |
| <i>AMDHD1</i> | amidohydrolase domain containing 1                          | -1.53 | -2.07 | 0.00206 | 0.0553 |

---

<sup>1</sup> Fold change was calculated from the signal log ratios as follows:  $2^{\text{Signal log ratio}}$  if signal log ratio  $\geq 0$  and  $(-1) \times 2^{-\text{(Signal log ratio)}}$  if signal log ratio  $< 0$ . Signal log ratios were calculated from n = 8 microarrays per group.

**Table S2**      **Characteristics of gene-specific primers.**

| Gene                   | Forward primer (from 5' to 3')<br>Reverse primer (from 5' to 3') | PCR product size<br>(bp) | NCBI GenBank<br>Accession no. | Annealing<br>temperature |
|------------------------|------------------------------------------------------------------|--------------------------|-------------------------------|--------------------------|
| <i>Reference genes</i> |                                                                  |                          |                               |                          |
| <i>EEF1A1</i>          | GTCAAAGATGTCCGTVC GTGGC<br>TGGCAGCGTCACCAGATTTC A                | 253                      | NM_174535.2                   | 60                       |
| <i>H3F3A</i>           | CTGTGGCACTCCGTGAAATTA<br>ACTTGCCTCCTGCAAA.GCAC                   | 154                      | NM_001014389.2                | 60                       |
| <i>RPL12</i>           | GGCAACTGGTGATTGGAAGG<br>TCTGCTTCTTTCTGTCCCTTGG                   | 143                      | NM_205797.1                   | 60                       |
| <i>Target genes</i>    |                                                                  |                          |                               |                          |
| <i>FGF21</i>           | TGTGGGTCCCTGTGCTGGCT<br>CCACTGTGCCATCGGCCCTG                     | 171                      | XM_001789587.1                | 65                       |
| <i>MT1E</i>            | TTGCTTTGGACGACCACACTTC<br>ATTGATACCTGGGGCAGGCTC                  | 246                      | NM_001114857.2                | 63                       |
| <i>GPX3</i>            | ACC ACC GCA CCA CGG TCA AC<br>GCC CGT GTG GTG GAC TTG GG         | 127                      | NM_174077.3                   | 63                       |
| <i>MT1A</i>            | ATCCGACCAGTGGATCTGCTTTGCC<br>AGACACAGCCCTGGGCACACT               | 209                      | NM_001040492.2                | 63                       |
| <i>STEAP4</i>          | AGCACCTCTCCCGCAGTTATG<br>GGACATCCCAGGGGTTCGAC                    | 183                      | XM_002686859.5                | 60                       |
| <i>MT2A</i>            | ACCCTCGCCATCCTTTGCTC<br>AGGGATGTAACAAACGGGTCAGG                  | 339                      | NM_001075140.1                | 60                       |
| <i>STK39</i>           | AGGAGGTTATCGGCAGTGGC<br>TGGGATGGCTGCACTGACTC                     | 162                      | NM_001075826.1                | 60                       |
| <i>PPP1R3C</i>         | TGCCATTGACCTACCCTCCG                                             | 142                      | NM_001076164.2                | 60                       |

|               |                                                   |     |                |    |
|---------------|---------------------------------------------------|-----|----------------|----|
| <i>INHBE</i>  | CCCGTCAGGCTTCCACTGTA<br>TTGCTGTCCTCACAGACTCCT     | 101 | NM_001205842.1 | 60 |
| <i>PKD1L3</i> | CCAGAGGCGAGCATGATACA<br>AGTGGCTAGACCATTCGACC      | 254 | XM_010814701   | 60 |
| <i>BCL6</i>   | CTGCTGTTTCAACTGGCGAC<br>TCATTTTAGAGTGCTCATTTGGTTT | 248 | NM_001206450.1 | 60 |
| <i>LBP</i>    | TGCTGTAGAACAGGCCACTG<br>TGCGCAAGAGGATACTGAGAC     | 218 | NM_001038674.2 | 60 |
| <i>HAL</i>    | TCGGAACCTGGACTCGATCT<br>CTAAGCCCTGAGAGATGCCG      | 268 | NM_001105440.1 | 60 |
| <i>MFSD2A</i> | CATGAGCTGCGAGGACGTAT<br>CGGTCCAGGTGAAGAAGGAA      | 231 | NM_001101959.1 | 60 |
| <i>LPIN1</i>  | TAATGCAGAAGCCCACCAGG<br>CTTCAGTTTCCCGACCGTCA      | 142 | NM_001206156.2 | 60 |
| <i>GSTM2</i>  | TTGTGTGGCGAGGACTTTGT<br>CTCCCCACCCCACATTATC       | 242 | XM_005204221.4 | 60 |
| <i>GSTM1</i>  | CCAGGAGGGAATAAGCAGGTG<br>GAGAAGACAAGTTTCAAGCCCA   | 193 | NM_175825.3    | 60 |
| <i>ASCL1</i>  | CTGTCATAGTCGGGAGCATCT<br>CCCCCAACTACTCCAACGAC     | 181 | XM_002687640.5 | 60 |
| <i>ERRFI1</i> | CCCTGCTTCCGAAGTCCATT<br>GCGAGTTTGAGAACGGCTTT      | 292 | NM_001077930.1 | 60 |
| <i>VWA3B</i>  | CTCTTGACAGGGGTAGCGG<br>GAAGCTGGCAGCATATTGGC       | 112 | XM_015473358.2 | 60 |
| <i>ATP10B</i> | CCCAGGCGTCTTCTGGATTT<br>GGGGTGGAGGAATTGTGTTCA     | 190 | XM_010798068   | 60 |
| <i>LGR5</i>   | CTTGGGCCCTTCTTGGTTTC<br>TGCAGTCAGGACACTCTCCA      | 192 | NM_001192520.3 | 60 |

|               |                                                                       |     |                |    |
|---------------|-----------------------------------------------------------------------|-----|----------------|----|
| <i>ZPR1</i>   | GCGCCATTCAAAGTCAGTGT<br>GCCACCACAAGGATTCCAGA<br>AGCTTCTTCGTTTCGCCCTTC | 144 | NM_001038504.1 | 60 |
| <i>ZNF37A</i> | AGGAGAGGATTCCGGAGCTT<br>AAACGGAGTCAGAGCCACAC                          | 153 | XM_010801271   | 60 |
| <i>AMDHD1</i> | CGGCGAGCGCTTCCTAAC<br>GTGGCTCCTGCCAACTTCAT                            | 261 | NM_001098872.2 | 60 |

---

**Table S3 Fold change (FC) and *P*-value of all differentially expressed transcripts\***

| Gene Symbol         | Gene Description                                                    | FGF21 high vs. FGF21 low |                 |
|---------------------|---------------------------------------------------------------------|--------------------------|-----------------|
|                     |                                                                     | FC                       | <i>P</i> -value |
| <i>FGF21</i>        | fibroblast growth factor 21                                         | 4.23                     | 0.00001         |
| <i>MT1E</i>         | metallothionein 1E                                                  | 3.58                     | 0.02151         |
| <i>GPX3</i>         | glutathione peroxidase 3 (plasma)                                   | 2.90                     | 0.04557         |
| <i>MT1A</i>         | metallothionein-1A                                                  | 2.64                     | 0.01646         |
| <i>MT1E</i>         | metallothionein 1E                                                  | 2.11                     | 0.04023         |
| <i>MIR708</i>       | microRNA mir-708                                                    | 2.00                     | 0.01304         |
| <i>STEAP4</i>       | STEAP family member 4                                               | 1.94                     | 0.04495         |
| <i>MT2A</i>         | metallothionein 2A                                                  | 1.89                     | 0.04520         |
| <i>SLC22A7</i>      | solute carrier family 22 (organic anion transporter), member 7      | 1.85                     | 0.00004         |
| <i>STK39</i>        | serine threonine kinase 39                                          | 1.81                     | 0.00307         |
| <i>PPP1R3C</i>      | protein phosphatase 1, regulatory subunit 3C                        | 1.74                     | 0.00644         |
| <i>INHBE</i>        | inhibin, beta E                                                     | 1.72                     | 0.00014         |
| <i>SPIDR</i>        | scaffolding protein involved in DNA repair                          | 1.70                     | 0.02979         |
| <i>PKD1L3</i>       | polycystic kidney disease 1-like 3                                  | 1.67                     | 0.01529         |
| <i>BCL6</i>         | B-cell CLL/lymphoma 6                                               | 1.67                     | 0.00271         |
| <i>LBP</i>          | lipopolysaccharide binding protein                                  | 1.67                     | 0.02337         |
| <i>LOC788334</i>    | apolipoprotein L3                                                   | 1.66                     | 0.02124         |
| <i>SAA4</i>         | serum amyloid A4, constitutive                                      | 1.64                     | 0.04790         |
| <i>WWC1</i>         | WW and C2 domain containing 1                                       | 1.64                     | 0.00131         |
| <i>MANF</i>         | mesencephalic astrocyte-derived neurotrophic factor                 | 1.62                     | 0.04617         |
| <i>PFKFB3</i>       | 6-phosphofructo-2-kinase/fructose-2,6-biphosphatase 3               | 1.62                     | 0.00081         |
| <i>SLC25A33</i>     | solute carrier family 25 (pyrimidine nucleotide carrier), member 33 | 1.60                     | 0.00269         |
| <i>PPP1R3B</i>      | protein phosphatase 1, regulatory subunit 3B                        | 1.59                     | 0.01829         |
| <i>INHBA</i>        | inhibin, beta A                                                     | 1.57                     | 0.00081         |
| <i>PFKFB2</i>       | 6-phosphofructo-2-kinase/fructose-2,6-biphosphatase 2               | 1.54                     | 0.00229         |
| <i>DCDC2</i>        | doublecortin domain containing 2                                    | 1.54                     | 0.01498         |
| <i>HSPA5</i>        | heat shock 70kDa protein 5 (glucose-regulated protein, 78kDa)       | 1.53                     | 0.04974         |
| <i>ARRDC3</i>       | arrestin domain containing 3                                        | 1.49                     | 0.00782         |
| <i>MID1IP1</i>      | MID1 interacting protein 1                                          | 1.49                     | 0.00076         |
| <i>LOC101908417</i> | complement C4-like                                                  | 1.47                     | 0.02331         |
| <i>SERPINA3-8</i>   | SERPINA3-8                                                          | 1.47                     | 0.03278         |
| <i>SGPL1</i>        | sphingosine-1-phosphate lyase 1                                     | 1.47                     | 0.00895         |
| <i>LOC104974345</i> | glycine N-acyltransferase-like                                      | 1.47                     | 0.02243         |
| <i>CPQ</i>          | carboxypeptidase Q                                                  | 1.46                     | 0.02643         |
| <i>DNAJB11</i>      | DnaJ (Hsp40) homolog, subfamily B, member 11                        | 1.44                     | 0.01839         |
| <i>MIR2284R</i>     | microRNA mir-2284r                                                  | 1.42                     | 0.01088         |

|                     |                                                                                                         |      |         |
|---------------------|---------------------------------------------------------------------------------------------------------|------|---------|
| <i>S100A12</i>      | S100 calcium binding protein A12                                                                        | 1.42 | 0.00605 |
| <i>PSPH</i>         | phosphoserine phosphatase                                                                               | 1.42 | 0.00009 |
| <i>LOC785811</i>    | olfactory receptor 12D2                                                                                 | 1.41 | 0.01320 |
| <i>LOC100336476</i> | granulocyte-macrophage colony-stimulating factor receptor subunit alpha                                 | 1.41 | 0.01720 |
| <i>TIMD4</i>        | T-cell immunoglobulin and mucin domain containing 4                                                     | 1.40 | 0.03793 |
| <i>CRELD2</i>       | cysteine-rich with EGF-like domains 2                                                                   | 1.40 | 0.01898 |
| <i>LOC104968675</i> | apolipoprotein L3-like                                                                                  | 1.39 | 0.02347 |
| <i>G0S2</i>         | G0/G1 switch 2                                                                                          | 1.39 | 0.00901 |
| <i>SLC39A14</i>     | solute carrier family 39 (zinc transporter), member 14                                                  | 1.39 | 0.00064 |
| <i>LOC786942</i>    | uncharacterized LOC786942                                                                               | 1.39 | 0.03517 |
| <i>LOC100300896</i> | sulfotransferase 1C4                                                                                    | 1.39 | 0.01453 |
| <i>LEAP2</i>        | liver expressed antimicrobial peptide 2                                                                 | 1.38 | 0.00339 |
| <i>SLC20A1</i>      | solute carrier family 20 (phosphate transporter), member 1                                              | 1.37 | 0.00127 |
| <i>SLC1A1</i>       | solute carrier family 1 (neuronal/epithelial high affinity glutamate transporter, system Xag), member 1 | 1.37 | 0.01857 |
| <i>ATP6V0D2</i>     | ATPase, H <sup>+</sup> transporting, lysosomal 38kDa, V0 subunit d2                                     | 1.37 | 0.01956 |
| <i>ASNS</i>         | asparagine synthetase (glutamine-hydrolyzing)                                                           | 1.37 | 0.03515 |
| <i>MIR874</i>       | microRNA mir-874                                                                                        | 1.36 | 0.01771 |
| <i>MAMSTR</i>       | MEF2 activating motif and SAP domain containing transcriptional regulator                               | 1.36 | 0.00082 |
| <i>CITED4</i>       | Cbp/p300-interacting transactivator, with Glu/Asp-rich carboxy-terminal domain, 4                       | 1.36 | 0.00001 |
| <i>ZCCHC10</i>      | zinc finger, CCHC domain containing 10                                                                  | 1.36 | 0.03243 |
| <i>ALDH1L2</i>      | aldehyde dehydrogenase 1 family, member L2                                                              | 1.35 | 0.02364 |
| <i>LARP1B</i>       | La ribonucleoprotein domain family, member 1B                                                           | 1.35 | 0.00307 |
| <i>GZMK</i>         | granzyme K (granzyme 3; tryptase II)                                                                    | 1.35 | 0.02657 |
| <i>GRAMD4</i>       | GRAM domain containing 4                                                                                | 1.34 | 0.00752 |
| <i>C15H11orf96</i>  | chromosome 15 open reading frame, human C11orf96                                                        | 1.34 | 0.00691 |
| <i>SLC16A1</i>      | solute carrier family 16 (monocarboxylate transporter), member 1                                        | 1.34 | 0.00055 |
| <i>MEIOB</i>        | meiosis specific with OB domains                                                                        | 1.34 | 0.00973 |
| <i>CS</i>           | citrate synthase                                                                                        | 1.34 | 0.00356 |
| <i>GLUL</i>         | glutamate-ammonia ligase                                                                                | 1.33 | 0.03033 |
| <i>HDHD3</i>        | haloacid dehalogenase-like hydrolase domain containing 3                                                | 1.33 | 0.00211 |
| <i>MICAL2</i>       | microtubule associated monooxygenase, calponin and LIM domain containing 2                              | 1.33 | 0.03967 |
| <i>SELK</i>         | selenoprotein K                                                                                         | 1.32 | 0.00698 |
| <i>UAP1</i>         | UDP-N-acetylglucosamine pyrophosphorylase 1                                                             | 1.32 | 0.00463 |
| <i>PPL</i>          | periplakin                                                                                              | 1.32 | 0.00366 |

|                     |                                                                                                |      |         |
|---------------------|------------------------------------------------------------------------------------------------|------|---------|
| <i>HERPUD1</i>      | homocysteine-inducible, endoplasmic reticulum stress-inducible, ubiquitin-like domain member 1 | 1.32 | 0.04380 |
| <i>EPHA2</i>        | EPH receptor A2                                                                                | 1.32 | 0.00227 |
| <i>MIR2372</i>      | microRNA mir-2372                                                                              | 1.32 | 0.03830 |
| <i>MDM4</i>         | MDM4, p53 regulator                                                                            | 1.32 | 0.00673 |
| <i>PLK2</i>         | polo-like kinase 2                                                                             | 1.32 | 0.01037 |
| <i>LOC785803</i>    | lysozyme 14D                                                                                   | 1.32 | 0.02452 |
| <i>RAP1GAP</i>      | RAP1 GTPase activating protein                                                                 | 1.31 | 0.00384 |
| <i>HES1</i>         | hes family bHLH transcription factor 1                                                         | 1.31 | 0.01160 |
| <i>NPR3</i>         | natriuretic peptide receptor 3                                                                 | 1.31 | 0.02876 |
| <i>XPO1</i>         | exportin 1                                                                                     | 1.31 | 0.01228 |
| <i>ATF4</i>         | activating transcription factor 4                                                              | 1.31 | 0.00130 |
| <i>RORC</i>         | RAR-related orphan receptor C                                                                  | 1.31 | 0.02388 |
| <i>IL4R</i>         | interleukin 4 receptor                                                                         | 1.31 | 0.00097 |
| <i>TMEM86A</i>      | transmembrane protein 86A                                                                      | 1.31 | 0.02259 |
| <i>WDR76</i>        | WD repeat domain 76                                                                            | 1.30 | 0.02358 |
| <i>LOC782221</i>    | olfactory receptor 8B3                                                                         | 1.30 | 0.00747 |
| <i>AGPAT9</i>       | 1-acylglycerol-3-phosphate O-acyltransferase 9                                                 | 1.30 | 0.02074 |
| <i>LYVE1</i>        | lymphatic vessel endothelial hyaluronan receptor 1                                             | 1.30 | 0.01631 |
| <i>KIF23</i>        | kinesin family member 23                                                                       | 1.30 | 0.04910 |
| <i>LOC101904076</i> | glutathione S-transferase theta-1-like                                                         | 1.30 | 0.02855 |
| <i>LOC784376</i>    | olfactory receptor 52D1                                                                        | 1.29 | 0.04756 |
| <i>LOC528329</i>    | uncharacterized LOC528329                                                                      | 1.29 | 0.01205 |
| <i>LOC787740</i>    | olfactory receptor 2A12                                                                        | 1.29 | 0.01747 |
| <i>ENTPD7</i>       | ectonucleoside triphosphate diphosphohydrolase 7                                               | 1.29 | 0.01661 |
| <i>NFIL3</i>        | nuclear factor, interleukin 3 regulated                                                        | 1.29 | 0.01156 |
| <i>ALPI</i>         | alkaline phosphatase, intestinal                                                               | 1.29 | 0.03577 |
| <i>C6H4orf19</i>    | chromosome 6 open reading frame, human C4orf19                                                 | 1.29 | 0.01004 |
| <i>STK38</i>        | serine/threonine kinase 38                                                                     | 1.28 | 0.00037 |
| <i>HS3ST3A1</i>     | heparan sulfate (glucosamine) 3-O-sulfotransferase 3A1                                         | 1.28 | 0.02186 |
| <i>LOC619125</i>    | putative SEC14-like protein 6                                                                  | 1.28 | 0.02206 |
| <i>ZFAND2A</i>      | zinc finger, AN1-type domain 2A                                                                | 1.28 | 0.01425 |
| <i>RGL1</i>         | ral guanine nucleotide dissociation stimulator-like 1                                          | 1.28 | 0.00155 |
| <i>CISD2</i>        | CDGSH iron sulfur domain 2                                                                     | 1.28 | 0.01803 |
| <i>STARD6</i>       | StAR-related lipid transfer (START) domain containing 6                                        | 1.28 | 0.02658 |
| <i>ASPHD2</i>       | aspartate beta-hydroxylase domain containing 2                                                 | 1.28 | 0.02626 |
| <i>DENND2A</i>      | DENN/MADD domain containing 2A                                                                 | 1.28 | 0.04855 |
| <i>LOC101907658</i> | 60S ribosomal protein L22-like 1                                                               | 1.27 | 0.02534 |
| <i>SOWAHB</i>       | sosondowah ankyrin repeat domain family member B                                               | 1.27 | 0.00575 |
| <i>LOC784623</i>    | olfactory receptor 5B12                                                                        | 1.27 | 0.01102 |
| <i>BOSTAUV1R403</i> | vomer nasal 1 receptor bosTauV1R403                                                            | 1.27 | 0.00838 |
| <i>SH3BP2</i>       | SH3-domain binding protein 2                                                                   | 1.27 | 0.02830 |
| <i>UGDH</i>         | UDP-glucose 6-dehydrogenase                                                                    | 1.27 | 0.00037 |



|                  |                                                                     |      |         |
|------------------|---------------------------------------------------------------------|------|---------|
| <i>ZNF608</i>    | zinc finger protein 608                                             | 1.27 | 0.02961 |
| <i>KRT6B</i>     | keratin 6B                                                          | 1.27 | 0.01084 |
| <i>CCDC79</i>    | coiled-coil domain containing 79                                    | 1.26 | 0.02048 |
| <i>CDKN1A</i>    | cyclin-dependent kinase inhibitor 1A (p21, Cip1)                    | 1.26 | 0.04303 |
| <i>USP50</i>     | ubiquitin specific peptidase 50                                     | 1.26 | 0.00089 |
| <i>LOC786352</i> | apolipoprotein L3                                                   | 1.26 | 0.01865 |
| <i>MAP1LC3A</i>  | microtubule-associated protein 1 light chain 3 alpha                | 1.26 | 0.00757 |
| <i>CCDC134</i>   | coiled-coil domain containing 134                                   | 1.26 | 0.03557 |
| <i>WFS1</i>      | Wolfram syndrome 1 (wolframin)                                      | 1.26 | 0.03334 |
| <i>HPX</i>       | hemopexin                                                           | 1.26 | 0.02358 |
| <i>RIOK1</i>     | RIO kinase 1                                                        | 1.26 | 0.00319 |
| <i>RNF144B</i>   | ring finger protein 144B                                            | 1.26 | 0.00606 |
| <i>TBC1D9</i>    | TBC1 domain family, member 9 (with GRAM domain)                     | 1.25 | 0.03029 |
| <i>C8H9orf89</i> | chromosome 8 open reading frame, human C9orf89                      | 1.25 | 0.00062 |
| <i>RRH</i>       | retinal pigment epithelium-derived rhodopsin homolog                | 1.25 | 0.00829 |
| <i>HAMP</i>      | hepcidin antimicrobial peptide                                      | 1.25 | 0.04570 |
| <i>FSTL1</i>     | folliculin-like 1                                                   | 1.25 | 0.02243 |
| <i>ATP8B1</i>    | ATPase, aminophospholipid transporter, class I, type 8B, member 1   | 1.25 | 0.01479 |
| <i>TMEM41B</i>   | transmembrane protein 41B                                           | 1.25 | 0.01878 |
| <i>RNF43</i>     | ring finger protein 43                                              | 1.25 | 0.00907 |
| <i>CDC42EP3</i>  | CDC42 effector protein (Rho GTPase binding) 3                       | 1.25 | 0.02708 |
| <i>FXVD6</i>     | FXVD domain containing ion transport regulator 6                    | 1.25 | 0.00515 |
| <i>FBXO21</i>    | F-box protein 21                                                    | 1.25 | 0.01659 |
| <i>ZHX3</i>      | zinc fingers and homeoboxes 3                                       | 1.24 | 0.00127 |
| <i>HSPB8</i>     | heat shock 22kDa protein 8                                          | 1.24 | 0.00307 |
| <i>TRIB3</i>     | tribbles pseudokinase 3                                             | 1.24 | 0.03366 |
| <i>IRF1</i>      | interferon regulatory factor 1                                      | 1.24 | 0.04070 |
| <i>MIR1197</i>   | microRNA mir-1197                                                   | 1.24 | 0.04820 |
| <i>RNF144A</i>   | ring finger protein 144A                                            | 1.24 | 0.00219 |
| <i>CDC37L1</i>   | cell division cycle 37-like 1                                       | 1.24 | 0.01153 |
| <i>C3H1orf52</i> | chromosome 3 open reading frame, human C1orf52                      | 1.24 | 0.02196 |
| <i>FYN</i>       | FYN proto-oncogene, Src family tyrosine kinase                      | 1.24 | 0.00232 |
| <i>CLDN15</i>    | claudin 15                                                          | 1.23 | 0.03785 |
| <i>FNDC3B</i>    | fibronectin type III domain containing 3B                           | 1.23 | 0.03420 |
| <i>CHAC1</i>     | ChaC glutathione-specific gamma-glutamylcyclotransferase 1          | 1.23 | 0.02543 |
| <i>IRF2BPL</i>   | interferon regulatory factor 2 binding protein-like                 | 1.23 | 0.00737 |
| <i>ZMYND10</i>   | zinc finger, MYND-type containing 10                                | 1.23 | 0.00808 |
| <i>FGL1</i>      | fibrinogen-like 1                                                   | 1.23 | 0.01453 |
| <i>CTPS1</i>     | CTP synthase 1                                                      | 1.23 | 0.02064 |
| <i>SLC4A7</i>    | solute carrier family 4, sodium bicarbonate cotransporter, member 7 | 1.23 | 0.00159 |
| <i>LITAF</i>     | lipopolysaccharide-induced TNF factor                               | 1.23 | 0.02406 |

|                  |                                                                                  |       |         |
|------------------|----------------------------------------------------------------------------------|-------|---------|
| <i>GALNTL6</i>   | polypeptide N-acetylgalactosaminyltransferase-like 6                             | 1.23  | 0.00361 |
| <i>OR1L6</i>     | olfactory receptor, family 1, subfamily L, member 6                              | 1.23  | 0.01562 |
| <i>SH2D1A</i>    | SH2 domain containing 1A                                                         | 1.23  | 0.00434 |
| <i>ID1</i>       | inhibitor of DNA binding 1, dominant negative helix-loop-helix protein           | 1.23  | 0.00571 |
| <i>GZMB</i>      | granzyme B (granzyme 2, cytotoxic T-lymphocyte-associated serine esterase 1)     | 1.22  | 0.02274 |
| <i>TTC7A</i>     | tetratricopeptide repeat domain 7A                                               | 1.22  | 0.00660 |
| <i>UBE2L6</i>    | ubiquitin-conjugating enzyme E2L 6                                               | 1.22  | 0.02858 |
| <i>FAM134B</i>   | family with sequence similarity 134, member B                                    | 1.22  | 0.00625 |
| <i>LOC785981</i> | olfactory receptor 7A17                                                          | 1.22  | 0.01594 |
| <i>MTHFD1L</i>   | methylenetetrahydrofolate dehydrogenase (NADP+ dependent) 1-like                 | 1.22  | 0.01228 |
| <i>CAGE1</i>     | cancer antigen 1                                                                 | 1.22  | 0.03954 |
| <i>LOC513333</i> | olfactory receptor 151                                                           | 1.22  | 0.02806 |
| <i>SLC38A7</i>   | solute carrier family 38, member 7                                               | 1.22  | 0.03120 |
| <i>CNOT1</i>     | CCR4-NOT transcription complex, subunit 1                                        | 1.22  | 0.02638 |
| <i>BCAR3</i>     | breast cancer anti-estrogen resistance 3                                         | 1.22  | 0.00482 |
| <i>SLC30A1</i>   | solute carrier family 30 (zinc transporter), member 1                            | 1.22  | 0.00688 |
| <i>CEBPA</i>     | CCAAT/enhancer binding protein (C/EBP), alpha                                    | 1.22  | 0.01341 |
| <i>LRCH1</i>     | leucine-rich repeats and calponin homology (CH) domain containing 1              | 1.21  | 0.00884 |
| <i>SKIL</i>      | SKI-like proto-oncogene                                                          | 1.21  | 0.01870 |
| <i>BIN2</i>      | bridging integrator 2                                                            | 1.21  | 0.01017 |
| <i>MIR487A</i>   | microRNA mir-487a                                                                | 1.21  | 0.04780 |
| <i>RCN2</i>      | reticulocalbin 2, EF-hand calcium binding domain                                 | 1.21  | 0.02028 |
| <i>SDC4</i>      | syndecan 4                                                                       | 1.21  | 0.01125 |
| <i>LRAT</i>      | lecithin retinol acyltransferase (phosphatidylcholine-retinol O-acyltransferase) | 1.21  | 0.01511 |
| <i>MIR144</i>    | microRNA mir-144                                                                 | 1.21  | 0.02171 |
| <i>PSMG4</i>     | proteasome (prosome, macropain) assembly chaperone 4                             | 1.21  | 0.02158 |
| <i>LOC515150</i> | apolipoprotein R                                                                 | 1.21  | 0.03285 |
| <i>CORO1C</i>    | coronin, actin binding protein, 1C                                               | 1.21  | 0.00772 |
| <i>PARM1</i>     | prostate androgen-regulated mucin-like protein 1                                 | 1.21  | 0.00159 |
| <i>C6H4orf32</i> | chromosome 6 open reading frame, human C4orf32                                   | 1.21  | 0.00220 |
| <i>IHH</i>       | indian hedgehog                                                                  | 1.21  | 0.02710 |
| <i>MIR208A</i>   | microRNA mir-208a                                                                | 1.21  | 0.04147 |
| <i>GPRC5C</i>    | G protein-coupled receptor, class C, group 5, member C                           | 1.21  | 0.00374 |
| <i>AGFG1</i>     | ArfGAP with FG repeats 1                                                         | 1.21  | 0.01705 |
| <i>TMEM50B</i>   | transmembrane protein 50B                                                        | 1.21  | 0.03759 |
| <i>PLAGL1</i>    | pleiomorphic adenoma gene-like 1                                                 | 1.21  | 0.01149 |
| <i>FLOT2</i>     | flotillin 2                                                                      | 1.21  | 0.01589 |
| <i>LOC783070</i> | 60S ribosomal protein L5 pseudogene                                              | -1.21 | 0.01177 |

|                     |                                                                                                           |       |         |
|---------------------|-----------------------------------------------------------------------------------------------------------|-------|---------|
| <i>PRR29</i>        | proline rich 29                                                                                           | -1.21 | 0.00032 |
| <i>BVD1.15</i>      | T cell receptor delta chain variable region BVd1.15                                                       | -1.21 | 0.01706 |
| <i>BCL11B</i>       | B-cell CLL/lymphoma 11B (zinc finger protein)                                                             | -1.21 | 0.03007 |
| <i>SMO</i>          | smoothened, frizzled class receptor                                                                       | -1.21 | 0.00139 |
| <i>ATP8A1</i>       | ATPase, aminophospholipid transporter (APLT), class I, type 8A, member 1                                  | -1.21 | 0.00893 |
| <i>FRMPD3</i>       | FERM and PDZ domain containing 3                                                                          | -1.21 | 0.01367 |
| <i>NPAS4</i>        | neuronal PAS domain protein 4                                                                             | -1.21 | 0.00828 |
| <i>TMEM38B</i>      | transmembrane protein 38B                                                                                 | -1.21 | 0.02574 |
| <i>GAS2</i>         | growth arrest-specific 2                                                                                  | -1.21 | 0.02180 |
| <i>TTC21B</i>       | tetratricopeptide repeat domain 21B                                                                       | -1.21 | 0.04557 |
| <i>PPFIA3</i>       | protein tyrosine phosphatase, receptor type, f polypeptide (PTPRF), interacting protein (liprin), alpha 3 | -1.21 | 0.00022 |
| <i>SLC51B</i>       | solute carrier family 51, beta subunit                                                                    | -1.21 | 0.04918 |
| <i>HRH3</i>         | histamine receptor H3                                                                                     | -1.21 | 0.01832 |
| <i>KRT26</i>        | keratin 26                                                                                                | -1.21 | 0.04773 |
| <i>STARD13</i>      | StAR-related lipid transfer (START) domain containing 13                                                  | -1.21 | 0.00033 |
| <i>FAAH</i>         | fatty acid amide hydrolase                                                                                | -1.21 | 0.01007 |
| <i>IFNAH</i>        | interferon alpha H                                                                                        | -1.21 | 0.02866 |
| <i>LOC100300010</i> | olfactory receptor 8S1                                                                                    | -1.21 | 0.01270 |
| <i>LONRF1</i>       | LON peptidase N-terminal domain and ring finger 1                                                         | -1.21 | 0.01748 |
| <i>SEL1L3</i>       | sel-1 suppressor of lin-12-like 3 (C. elegans)                                                            | -1.21 | 0.04107 |
| <i>C5H12orf71</i>   | chromosome 5 open reading frame, human C12orf71                                                           | -1.21 | 0.02732 |
| <i>ANTXR2</i>       | anthrax toxin receptor 2                                                                                  | -1.21 | 0.01263 |
| <i>LOC101906359</i> | Y-box-binding protein 3-like                                                                              | -1.21 | 0.03913 |
| <i>MMP12</i>        | matrix metalloproteinase 12 (macrophage elastase)                                                         | -1.21 | 0.02363 |
| <i>G6PC</i>         | glucose-6-phosphatase, catalytic subunit                                                                  | -1.21 | 0.01044 |
| <i>ASPRV1</i>       | aspartic peptidase, retroviral-like 1                                                                     | -1.22 | 0.00223 |
| <i>GRIN2C</i>       | glutamate receptor, ionotropic, N-methyl D-aspartate 2C                                                   | -1.22 | 0.00711 |
| <i>PPM1K</i>        | protein phosphatase, Mg <sup>2+</sup> /Mn <sup>2+</sup> dependent, 1K                                     | -1.22 | 0.01647 |
| <i>PROX2</i>        | prospero homeobox 2                                                                                       | -1.22 | 0.00111 |
| <i>MIR184</i>       | microRNA mir-184                                                                                          | -1.22 | 0.04469 |
| <i>ENO2</i>         | enolase 2 (gamma, neuronal)                                                                               | -1.22 | 0.02159 |
| <i>CLDN1</i>        | claudin 1                                                                                                 | -1.22 | 0.02000 |
| <i>LOC100848786</i> | lipid phosphate phosphatase-related protein type 5                                                        | -1.22 | 0.01549 |
| <i>SCN9A</i>        | sodium channel, voltage-gated, type IX, alpha subunit                                                     | -1.22 | 0.04638 |
| <i>HCRTR2</i>       | hypocretin (orexin) receptor 2                                                                            | -1.22 | 0.04439 |
| <i>ZNF319</i>       | zinc finger protein 319                                                                                   | -1.22 | 0.00919 |
| <i>CCDC7</i>        | coiled-coil domain containing 7                                                                           | -1.22 | 0.01962 |
| <i>DMP1</i>         | dentin matrix acidic phosphoprotein 1                                                                     | -1.22 | 0.00336 |
| <i>INSIG2</i>       | insulin induced gene 2                                                                                    | -1.22 | 0.03109 |
| <i>GJA3</i>         | gap junction protein, alpha 3, 46kDa                                                                      | -1.22 | 0.00165 |

|                     |                                                                       |       |         |
|---------------------|-----------------------------------------------------------------------|-------|---------|
| <i>SGCZ</i>         | sarcoglycan, zeta                                                     | -1.22 | 0.01501 |
| <i>KRT1</i>         | keratin 1                                                             | -1.22 | 0.00436 |
| <i>IP6K2</i>        | inositol hexakisphosphate kinase 2                                    | -1.22 | 0.02957 |
| <i>ATL1</i>         | atlastin GTPase 1                                                     | -1.22 | 0.01418 |
| <i>LOC538872</i>    | dual specificity phosphatase 18-like                                  | -1.22 | 0.02587 |
| <i>CRABP2</i>       | cellular retinoic acid binding protein 2                              | -1.22 | 0.00698 |
| <i>PBLD</i>         | phenazine biosynthesis-like protein domain containing                 | -1.23 | 0.02703 |
| <i>LOC787011</i>    | uncharacterized protein CXorf66 homolog                               | -1.23 | 0.00691 |
| <i>RIMBP3B</i>      | RIMS binding protein 3B                                               | -1.23 | 0.02487 |
| <i>LOC100300695</i> | intelectin-2                                                          | -1.23 | 0.01674 |
| <i>ZNF750</i>       | zinc finger protein 750                                               | -1.23 | 0.01019 |
| <i>NT5DC1</i>       | 5-nucleotidase domain containing 1                                    | -1.23 | 0.01786 |
| <i>LOC504344</i>    | olfactory receptor 4F15                                               | -1.23 | 0.02552 |
| <i>LOC784187</i>    | olfactory receptor 51L1                                               | -1.23 | 0.04964 |
| <i>RAB3C</i>        | RAB3C, member RAS oncogene family                                     | -1.23 | 0.00064 |
| <i>LOC101906200</i> | ninjurin-1 pseudogene                                                 | -1.23 | 0.01542 |
| <i>LOC537188</i>    | UDP-glucuronosyltransferase 3A1-like                                  | -1.24 | 0.00249 |
| <i>AGL</i>          | amylase-1, 6-glucosidase, 4-alpha-glucanotransferase                  | -1.24 | 0.01408 |
| <i>RBMS2</i>        | RNA binding motif, single stranded interacting protein 2              | -1.24 | 0.01436 |
| <i>MBNL3</i>        | muscleblind-like splicing regulator 3                                 | -1.24 | 0.02344 |
| <i>LOC784679</i>    | peptidyl-prolyl cis-trans isomerase A                                 | -1.24 | 0.03099 |
| <i>FAM71B</i>       | family with sequence similarity 71, member B                          | -1.24 | 0.00498 |
| <i>LOC100125266</i> | alkaline phosphatase-like                                             | -1.24 | 0.04400 |
| <i>OR2G6</i>        | olfactory receptor, family 2, subfamily G, member 6                   | -1.24 | 0.00475 |
| <i>PK2</i>          | pyruvate dehydrogenase kinase, isozyme 2                              | -1.24 | 0.01237 |
| <i>FST</i>          | follistatin                                                           | -1.24 | 0.00289 |
| <i>MYBL2</i>        | v-myb avian myeloblastosis viral oncogene homolog-like 2              | -1.24 | 0.00132 |
| <i>LOC785899</i>    | olfactory receptor 1440                                               | -1.24 | 0.02496 |
| <i>AQP9</i>         | aquaporin 9                                                           | -1.24 | 0.00390 |
| <i>GABRQ</i>        | gamma-aminobutyric acid (GABA) A receptor, theta                      | -1.24 | 0.00578 |
| <i>TMEM184C</i>     | transmembrane protein 184C                                            | -1.25 | 0.04891 |
| <i>OPN1SW</i>       | opsin 1 (cone pigments), short-wave-sensitive                         | -1.25 | 0.01030 |
| <i>SLC16A10</i>     | solute carrier family 16 (aromatic amino acid transporter), member 10 | -1.25 | 0.00681 |
| <i>MIR2475</i>      | microRNA mir-2475                                                     | -1.25 | 0.01011 |
| <i>MIR1603</i>      | microRNA mir-1603                                                     | -1.25 | 0.00738 |
| <i>LOC511642</i>    | olfactory receptor 18                                                 | -1.25 | 0.03583 |
| <i>LOC788998</i>    | olfactory receptor, family 9, subfamily K, member 2-like              | -1.25 | 0.01252 |
| <i>PLCG2</i>        | phospholipase C, gamma 2 (phosphatidylinositol-specific)              | -1.25 | 0.00039 |

|                     |                                                                                               |       |         |
|---------------------|-----------------------------------------------------------------------------------------------|-------|---------|
| <i>ABCB11</i>       | ATP-binding cassette, sub-family B (MDR/TAP), member 11                                       | -1.25 | 0.01637 |
| <i>ELL2</i>         | elongation factor, RNA polymerase II, 2                                                       | -1.25 | 0.02513 |
| <i>OTC</i>          | ornithine carbamoyltransferase                                                                | -1.25 | 0.00401 |
| <i>TMEM144</i>      | transmembrane protein 144                                                                     | -1.25 | 0.04843 |
| <i>FIGF</i>         | c-fos induced growth factor (vascular endothelial growth factor D)                            | -1.25 | 0.00748 |
| <i>TAT</i>          | tyrosine aminotransferase                                                                     | -1.25 | 0.03960 |
| <i>LOC100848572</i> | keratin-associated protein 4-7-like                                                           | -1.25 | 0.03490 |
| <i>MIR23A</i>       | microRNA mir-23a                                                                              | -1.26 | 0.01646 |
| <i>SERPINE3</i>     | serpin peptidase inhibitor, clade E (nexin, plasminogen activator inhibitor type 1), member 3 | -1.26 | 0.00217 |
| <i>MIR105B</i>      | microRNA mir-105b                                                                             | -1.26 | 0.02745 |
| <i>HSD11B1</i>      | hydroxysteroid (11-beta) dehydrogenase 1                                                      | -1.26 | 0.00165 |
| <i>LOC101903205</i> | alpha-2-macroglobulin receptor-associated protein pseudogene                                  | -1.26 | 0.01288 |
| <i>SALL1</i>        | spalt-like transcription factor 1                                                             | -1.26 | 0.03715 |
| <i>OR51E1</i>       | olfactory receptor, family 51, subfamily E, member 1                                          | -1.26 | 0.00028 |
| <i>LOC785144</i>    | olfactory receptor, family 51, subfamily E, member 2-like                                     | -1.26 | 0.04072 |
| <i>JAKMIP2</i>      | janus kinase and microtubule interacting protein 2                                            | -1.26 | 0.00166 |
| <i>IQCF1</i>        | IQ motif containing F1                                                                        | -1.26 | 0.01104 |
| <i>LOC100297248</i> | Ig kappa chain V-III region PC 7210                                                           | -1.26 | 0.02055 |
| <i>LOC504570</i>    | olfactory receptor 1L4                                                                        | -1.27 | 0.03432 |
| <i>MYC</i>          | v-myc avian myelocytomatosis viral oncogene homolog                                           | -1.27 | 0.04674 |
| <i>C18H16orf87</i>  | chromosome 18 open reading frame, human C16orf87                                              | -1.27 | 0.00823 |
| <i>LOC104975671</i> | ubiquitin D-like                                                                              | -1.27 | 0.00977 |
| <i>GLP1R</i>        | glucagon-like peptide 1 receptor                                                              | -1.27 | 0.01386 |
| <i>MAT1A</i>        | methionine adenosyltransferase I, alpha                                                       | -1.27 | 0.00005 |
| <i>ZNF883</i>       | zinc finger protein 883                                                                       | -1.27 | 0.01005 |
| <i>RASSF6</i>       | Ras association (RalGDS/AF-6) domain family member 6                                          | -1.27 | 0.03790 |
| <i>KCNJ2</i>        | potassium inwardly-rectifying channel, subfamily J, member 2                                  | -1.27 | 0.04198 |
| <i>LOC101905711</i> | heme-binding protein 1                                                                        | -1.28 | 0.03768 |
| <i>LOC787624</i>    | ADAMTS-like protein 3                                                                         | -1.28 | 0.01883 |
| <i>LOC783144</i>    | 60S ribosomal protein L13 pseudogene                                                          | -1.28 | 0.00231 |
| <i>LOC787129</i>    | glycine cleavage system H protein, mitochondrial                                              | -1.28 | 0.00175 |
| <i>ARHGEF9</i>      | Cdc42 guanine nucleotide exchange factor (GEF) 9                                              | -1.28 | 0.03088 |
| <i>GRIK3</i>        | glutamate receptor, ionotropic, kainate 3                                                     | -1.28 | 0.00036 |
| <i>LOC504233</i>    | olfactory receptor 2A1/2A42                                                                   | -1.28 | 0.04420 |
| <i>LOC789943</i>    | olfactory receptor 13C2                                                                       | -1.28 | 0.02491 |
| <i>LOC100299372</i> | olfactory receptor 2S2                                                                        | -1.28 | 0.02331 |
| <i>STXBP6</i>       | syntaxin binding protein 6 (amisyn)                                                           | -1.28 | 0.02821 |

|                      |                                                                                                   |       |         |
|----------------------|---------------------------------------------------------------------------------------------------|-------|---------|
| <i>LOC783917</i>     | olfactory receptor 187                                                                            | -1.28 | 0.02245 |
| <i>LOC785712</i>     | olfactory receptor 12D2                                                                           | -1.29 | 0.02805 |
| <i>GSAP</i>          | gamma-secretase activating protein                                                                | -1.29 | 0.04778 |
| <i>LOC751804</i>     | WC1 isolate DV100                                                                                 | -1.29 | 0.01612 |
| <i>SOX5</i>          | SRY (sex determining region Y)-box 5                                                              | -1.29 | 0.00356 |
| <i>BPIFA2B</i>       | BPI fold containing family A, member 2B                                                           | -1.29 | 0.00986 |
| <i>PIGP</i>          | phosphatidylinositol glycan anchor biosynthesis, class P                                          | -1.29 | 0.04820 |
| <i>SNCAIP</i>        | synuclein, alpha interacting protein                                                              | -1.29 | 0.01033 |
| <i>MIR27B</i>        | microRNA mir-27b                                                                                  | -1.29 | 0.00498 |
| <i>LOC522775</i>     | olfactory receptor 8J2                                                                            | -1.29 | 0.00738 |
| <i>LOC618034</i>     | olfactory receptor 12D3                                                                           | -1.29 | 0.02320 |
| <i>UHRF1</i>         | ubiquitin-like with PHD and ring finger domains 1                                                 | -1.29 | 0.01016 |
| <i>FGF12</i>         | fibroblast growth factor 12                                                                       | -1.29 | 0.00191 |
| <i>SLC25A30</i>      | solute carrier family 25, member 30                                                               | -1.29 | 0.01297 |
| <i>LOC100337180</i>  | eukaryotic translation elongation factor 1 alpha 1 pseudogene                                     | -1.30 | 0.03742 |
| <i>IVD</i>           | isovaleryl-CoA dehydrogenase                                                                      | -1.30 | 0.00096 |
| <i>LOC788079</i>     | olfactory receptor 2L8                                                                            | -1.30 | 0.04603 |
| <i>FOXP1</i>         | forkhead box P1                                                                                   | -1.30 | 0.02469 |
| <i>NECAB2</i>        | N-terminal EF-hand calcium binding protein 2                                                      | -1.30 | 0.02836 |
| <i>LOC100337053</i>  | multidrug resistance-associated protein 4-like                                                    | -1.30 | 0.04205 |
| <i>LOC617135</i>     | interferon omega-1                                                                                | -1.31 | 0.00591 |
| <i>TDH</i>           | L-threonine dehydrogenase                                                                         | -1.31 | 0.00025 |
| <i>MIR940</i>        | microRNA mir-940                                                                                  | -1.31 | 0.00153 |
| <i>PNP</i>           | purine nucleoside phosphorylase                                                                   | -1.31 | 0.00171 |
| <i>EDNRA</i>         | endothelin receptor type A                                                                        | -1.31 | 0.01341 |
| <i>ADH4</i>          | alcohol dehydrogenase 4 (class II), pi polypeptide                                                | -1.31 | 0.00334 |
| <i>OR5D18</i>        | olfactory receptor, family 5, subfamily D, member 18                                              | -1.31 | 0.02317 |
| <i>ZNF679</i>        | zinc finger protein 679                                                                           | -1.32 | 0.00631 |
| <i>FBP1</i>          | fructose-1,6-bisphosphatase 1                                                                     | -1.32 | 0.00134 |
| <i>SMARCA1</i>       | SWI/SNF related, matrix associated, actin dependent regulator of chromatin, subfamily a, member 1 | -1.32 | 0.00123 |
| <i>LOC515551</i>     | protein DDI1 homolog 2                                                                            | -1.32 | 0.00613 |
| <i>BOSTAUUV1R414</i> | vomeroneasal 1 receptor bosTauV1R414                                                              | -1.32 | 0.02124 |
| <i>LOC515540</i>     | olfactory receptor 1E2                                                                            | -1.32 | 0.04412 |
| <i>CITED1</i>        | Cbp/p300-interacting transactivator, with Glu/Asp-rich carboxy-terminal domain, 1                 | -1.32 | 0.00302 |
| <i>LOC508595</i>     | olfactory receptor 51G2                                                                           | -1.33 | 0.03560 |
| <i>PCTP</i>          | phosphatidylcholine transfer protein                                                              | -1.33 | 0.00697 |
| <i>LOC531650</i>     | H2B histone family, member W, testis-specific-like pseudogene                                     | -1.33 | 0.01198 |
| <i>LOC782554</i>     | putative olfactory receptor 2W6                                                                   | -1.33 | 0.04590 |
| <i>LOC100298264</i>  | uncharacterized LOC100298264                                                                      | -1.33 | 0.01968 |
| <i>BTG2</i>          | BTG family, member 2                                                                              | -1.33 | 0.02334 |
| <i>LOC513329</i>     | major allergen Equ c 1                                                                            | -1.34 | 0.01500 |

|                     |                                                                                   |       |         |
|---------------------|-----------------------------------------------------------------------------------|-------|---------|
| <i>GNAT3</i>        | guanine nucleotide binding protein, alpha transducing 3                           | -1.34 | 0.00017 |
| <i>TDRD10</i>       | tudor domain containing 10                                                        | -1.34 | 0.04056 |
| <i>GYS2</i>         | glycogen synthase 2 (liver)                                                       | -1.34 | 0.01646 |
| <i>LOC524160</i>    | olfactory receptor 2T3                                                            | -1.34 | 0.01028 |
| <i>LOC523582</i>    | olfactory receptor 12                                                             | -1.34 | 0.03900 |
| <i>LOC100298605</i> | olfactory receptor 5T2                                                            | -1.34 | 0.03626 |
| <i>GLYATL3</i>      | glycine-N-acyltransferase-like 3                                                  | -1.34 | 0.00768 |
| <i>ARG2</i>         | arginase 2                                                                        | -1.35 | 0.00066 |
| <i>MIR103-2</i>     | microRNA mir-103-2                                                                | -1.35 | 0.04396 |
| <i>GSTA2</i>        | glutathione S-transferase alpha 2                                                 | -1.36 | 0.03955 |
| <i>LOC100336901</i> | olfactory receptor 8J3                                                            | -1.36 | 0.04626 |
| <i>SLC25A15</i>     | solute carrier family 25 (mitochondrial carrier; ornithine transporter) member 15 | -1.36 | 0.00889 |
| <i>MIR339B</i>      | microRNA mir-339b                                                                 | -1.37 | 0.02691 |
| <i>LOC510712</i>    | olfactory receptor 7A17                                                           | -1.37 | 0.00005 |
| <i>BICC1</i>        | BicC family RNA binding protein 1                                                 | -1.38 | 0.00169 |
| <i>LOC523530</i>    | nuclear RNA export factor 3                                                       | -1.38 | 0.01477 |
| <i>ADRA1A</i>       | adrenoceptor alpha 1A                                                             | -1.38 | 0.00143 |
| <i>MOGAT1</i>       | monoacylglycerol O-acyltransferase 1                                              | -1.38 | 0.00184 |
| <i>LOC788220</i>    | olfactory receptor 6C76                                                           | -1.38 | 0.00570 |
| <i>ADRB2</i>        | adrenoceptor beta 2, surface                                                      | -1.39 | 0.00079 |
| <i>PCDH19</i>       | protocadherin 19                                                                  | -1.39 | 0.00243 |
| <i>SLC4A4</i>       | solute carrier family 4 (sodium bicarbonate cotransporter), member 4              | -1.39 | 0.03198 |
| <i>DBP</i>          | D site of albumin promoter (albumin D-box) binding protein                        | -1.40 | 0.01658 |
| <i>CCRN4L</i>       | CCR4 carbon catabolite repression 4-like (S. cerevisiae)                          | -1.40 | 0.01715 |
| <i>ATP10B</i>       | ATPase, class V, type 10B                                                         | -1.40 | 0.01451 |
| <i>ACMSD</i>        | aminocarboxymuconate semialdehyde decarboxylase                                   | -1.40 | 0.04530 |
| <i>LOC786363</i>    | tumor susceptibility gene 101 protein pseudogene                                  | -1.41 | 0.00950 |
| <i>LOC100138638</i> | retinol dehydrogenase 16-like                                                     | -1.41 | 0.01970 |
| <i>IRS2</i>         | insulin receptor substrate 2                                                      | -1.41 | 0.00418 |
| <i>LOC104976490</i> | complement factor H-like                                                          | -1.41 | 0.00587 |
| <i>LRP2</i>         | low density lipoprotein receptor-related protein 2                                | -1.42 | 0.00660 |
| <i>VNN1</i>         | vanin 1                                                                           | -1.42 | 0.04659 |
| <i>LOC100337097</i> | cationic amino acid transporter 3-like                                            | -1.42 | 0.01886 |
| <i>ARG1</i>         | arginase 1                                                                        | -1.42 | 0.01348 |
| <i>PPARGC1A</i>     | peroxisome proliferator-activated receptor gamma, coactivator 1 alpha             | -1.42 | 0.01809 |
| <i>LOC618124</i>    | olfactory receptor, family 1, subfamily E, member 2-like                          | -1.44 | 0.04559 |
| <i>LOC527057</i>    | multidrug resistance-associated protein 4-like                                    | -1.45 | 0.03897 |
| <i>LOC531237</i>    | olfactory receptor 4C13                                                           | -1.45 | 0.00140 |

|                |                                                                                |       |         |
|----------------|--------------------------------------------------------------------------------|-------|---------|
| <i>SLC7A2</i>  | solute carrier family 7 (cationic amino acid transporter, y+ system), member 2 | -1.46 | 0.00679 |
| <i>SOCS2</i>   | suppressor of cytokine signaling 2                                             | -1.47 | 0.02636 |
| <i>DIRAS3</i>  | DIRAS family, GTP-binding RAS-like 3                                           | -1.47 | 0.00187 |
| <i>TDO2</i>    | tryptophan 2,3-dioxygenase                                                     | -1.47 | 0.00534 |
| <i>TLE1</i>    | transducin-like enhancer of split 1 (E(sp1) homolog, Drosophila)               | -1.48 | 0.00092 |
| <i>XPNPEP2</i> | X-prolyl aminopeptidase (aminopeptidase P) 2, membrane-bound                   | -1.49 | 0.03487 |
| <i>PPAP2B</i>  | phosphatidic acid phosphatase type 2B                                          | -1.49 | 0.00067 |
| <i>LURAP1L</i> | leucine rich adaptor protein 1-like                                            | -1.49 | 0.01546 |
| <i>TEX12</i>   | testis expressed 12                                                            | -1.51 | 0.02480 |
| <i>RALGPS2</i> | Ral GEF with PH domain and SH3 binding motif 2                                 | -1.53 | 0.02406 |
| <i>AMDHD1</i>  | amidohydrolase domain containing 1                                             | -1.53 | 0.00206 |
| <i>ZNF37A</i>  | zinc finger protein 37A                                                        | -1.54 | 0.00651 |
| <i>ZPR1</i>    | ZPR1 zinc finger                                                               | -1.55 | 0.00124 |
| <i>LGR5</i>    | leucine-rich repeat containing G protein-coupled receptor 5                    | -1.56 | 0.01635 |
| <i>ATP10B</i>  | ATPase, class V, type 10B                                                      | -1.57 | 0.00278 |
| <i>VWA3B</i>   | von Willebrand factor A domain containing 3B                                   | -1.58 | 0.01272 |
| <i>GLS2</i>    | glutaminase 2 (liver, mitochondrial)                                           | -1.59 | 0.00007 |
| <i>ERRFI1</i>  | ERBB receptor feedback inhibitor 1                                             | -1.60 | 0.00724 |
| <i>ASCL1</i>   | achaete-scute family bHLH transcription factor 1                               | -1.64 | 0.02755 |
| <i>GSTM1</i>   | glutathione S-transferase M1                                                   | -1.68 | 0.00878 |
| <i>GSTM2</i>   | glutathione S-transferase M2                                                   | -1.75 | 0.00998 |
| <i>LPIN1</i>   | lipin 1                                                                        | -1.77 | 0.01014 |
| <i>MFSD2A</i>  | major facilitator superfamily domain containing 2A                             | -1.89 | 0.00185 |
| <i>HAL</i>     | histidine ammonia-lyase                                                        | -1.91 | 0.00167 |
| <i>PDK4</i>    | pyruvate dehydrogenase kinase, isozyme 4                                       | -1.93 | 0.00002 |

\*Filter criteria: FC > 1.2 and < -1.2 and P < 0.05 between FGF21 high vs. FGF21 low group. FCs were calculated from the signal log ratios, which were calculated from n = 8 microarrays per group.
